# Supplementary material for: The Property of a Key Amino Acid Determines the Function of Farnesyl Pyrophosphate Synthase in Sporobolomyces pararoseus NGR
Source: MDPI journal article supplement (doi:10.3390/cimb46040195), 2024-04-03
Supplement: s1 [file s1]

## Supplement information

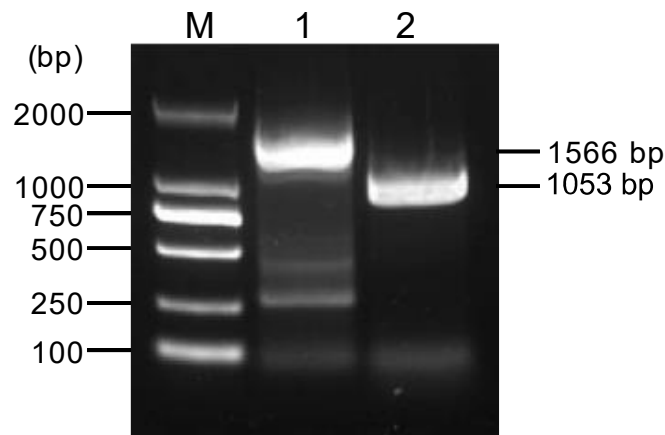

Figure. S1 Electrophoresis results of *SpFPPS* gene in *S. pararoeseus* NGR. (M: Marker; 1: genomic DNA; 2: cDNA)

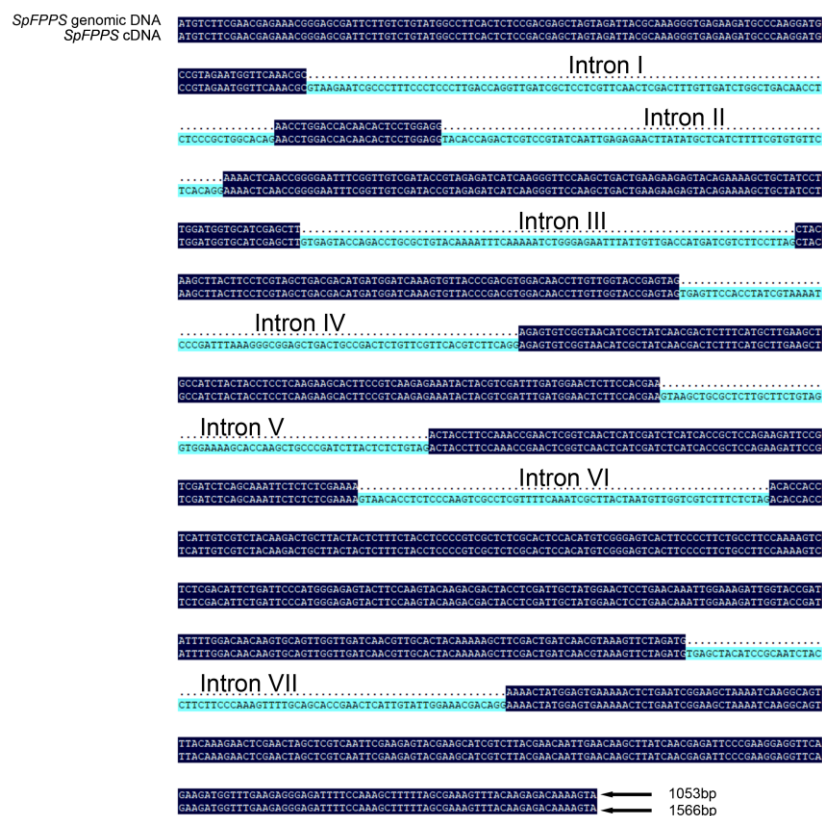

Figure S2 Sequence comparison of cDNA and genomic DNA of *S. pararoeseus* NGR *SpFPPS*.

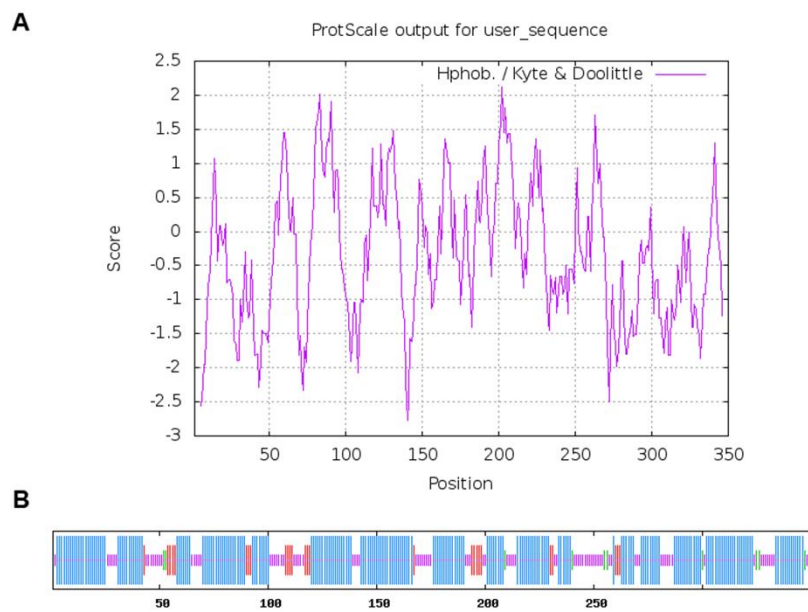

Figure. S3 Bioinformatics analysis of the *S. pararoseus* NGR SpFPPS protein.

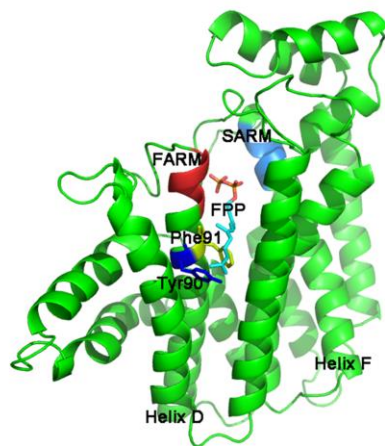

Figure S4. Model of the three-dimensional structure of the *S. pararoseus* NGR SpFPPS.

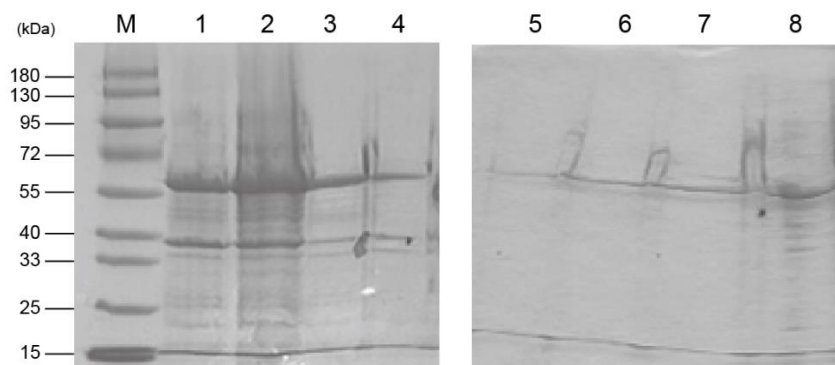

Figure. S5 SDS-PAGE analysis of recombinant protein.

SDS-PAGE analysis of pET32a-SpFPPS induced to be expressed at different temperatures. (M: Marker; 1-4: Supernatants of BL21(DE3) strains carrying plasmid pET32a-SpFPPS after fragmentation induced at 28, 26, 23 and 20°C; 5-8: precipitate after fragmentation of BL21(DE3) strain carrying plasmid pET32a-SpFPPS).

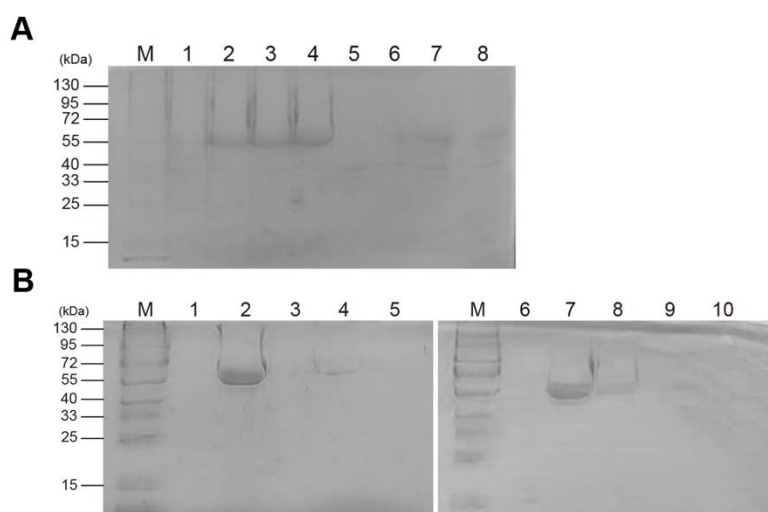

Figure. S6 SDS-PAGE analysis of protein.

A. SDS-PAGE analysis of protein pET32a, pET32a-SpFPPS, SpFPPS-Y90A and SpFPPS-Y90K (M: Marker; 1-4: supernatants of BL21(DE3) strains carrying plasmid pET32a, pET32a-SpFPPS, SpFPPS-Y90A and SpFPPS-Y90K after fragmentation; 5-8: precipitation of BL21(DE3) strain carrying plasmid pET32a, pET32a-SpFPPS, SpFPPS-Y90A and SpFPPS-Y90K after fragmentation)

## B. Purification of protein SpFPPS-Y90A and SpFPPS-Y90K

(M: Marker; 1-5: SpFPPS-Y90A was sequentially eluted using Elution Buffer; 6-10: SpFPPS-Y90K was sequentially eluted using Elution Buffer)

**Table S1.** Primers used in this study.

| Primers             | Sequences (5'-3')                 | Restriction Enzymes |
|---------------------|-----------------------------------|---------------------|
| <i>FPPS-F</i>       | CGGGATCCATGTCTTCGAACGAGAAACGG     | <i>Bam</i> HI       |
| <i>FPPS-R</i>       | CGAGCTCCTACTTTTGTCTCTTGTAACCTTTCG | <i>Sac</i> I        |
| <i>FPPS-Y90A-Fm</i> | ACAAGCTGCCTTCCTCGTAG              | -                   |
| <i>FPPS-Y90A-Rm</i> | CTACGAGGAAGGCAGCTTGTA             | -                   |
| <i>FPPS-Y90K-Fm</i> | ACAAGCTAAATTCCTCGTAGCTG           | -                   |
| <i>FPPS-Y90K-Rm</i> | CTACGAGGAATTAGCTTGTAAGAAGC        | -                   |

Note: The restriction sites were underlined, the shadow mark was replaced base. All primers were synthesized by Shanghai Sangon Inc.

**Table S2.** Plasmid used in this study and their main characteristics.

| Plasmids                    | Relevant Characteristics | Source or Reference    |
|-----------------------------|--------------------------|------------------------|
| pMD18-T vector              | Amp <sup>r</sup>         | Takara, Beijing, China |
| pET-32a (+) vector          | Amp <sup>r</sup>         | This study             |
| pMD18-T- <i>SpFPPS</i>      | Amp <sup>r</sup>         | This study             |
| pET32a- <i>SpFPPS</i>       | Amp <sup>r</sup>         | This study             |
| pMD18-T- <i>SpFPPS-Y90A</i> | Amp <sup>r</sup>         | This study             |
| pET32a- <i>SpFPPS-Y90A</i>  | Amp <sup>r</sup>         | This study             |
| pMD18-T- <i>SpFPPS-Y90K</i> | Amp <sup>r</sup>         | This study             |
| pET32a- <i>SpFPPS-Y90K</i>  | Amp <sup>r</sup>         | This study             |

Note: Amp<sup>r</sup>: ampicillin resistant.
