# Supplementary material for: The Property of a Key Amino Acid Determines the Function of Farnesyl Pyrophosphate Synthase in Sporobolomyces pararoseus NGR
Source: Curr Issues Mol Biol. 2024 Apr 3;46(4):3108–21. doi: 10.3390/cimb46040195 (PMC11048977; doi:10.3390/cimb46040195)
Supplement: Supplementary file 1 [file cimb-46-00195-s001.zip]

Archive with 7 entries (7 files):
- Figure S1.svg
- Figure S2.svg
- Figure S3.tif
- Figure S4.svg
- Figure S5.tif
- FigureS6.tif
- Supplyment information.pdf
